# Supplementary material for: Automated oxygen administration versus manual control in acute cardiovascular care: a randomised controlled trial
Source: PubMed Central journal article supplement — Heart. 2024 Nov 1;111(1):e324488. doi: 10.1136/heartjnl-2024-324488 (PMC11671931; doi:10.1136/heartjnl-2024-324488), 2024-11-01

# Supraventricular tachycarida

## Under desired interval

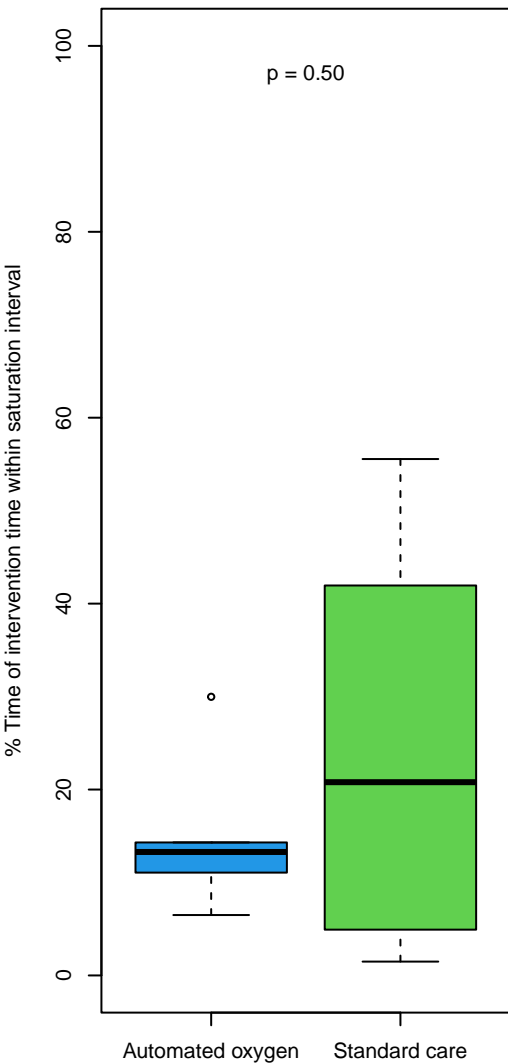

## Within desired interval

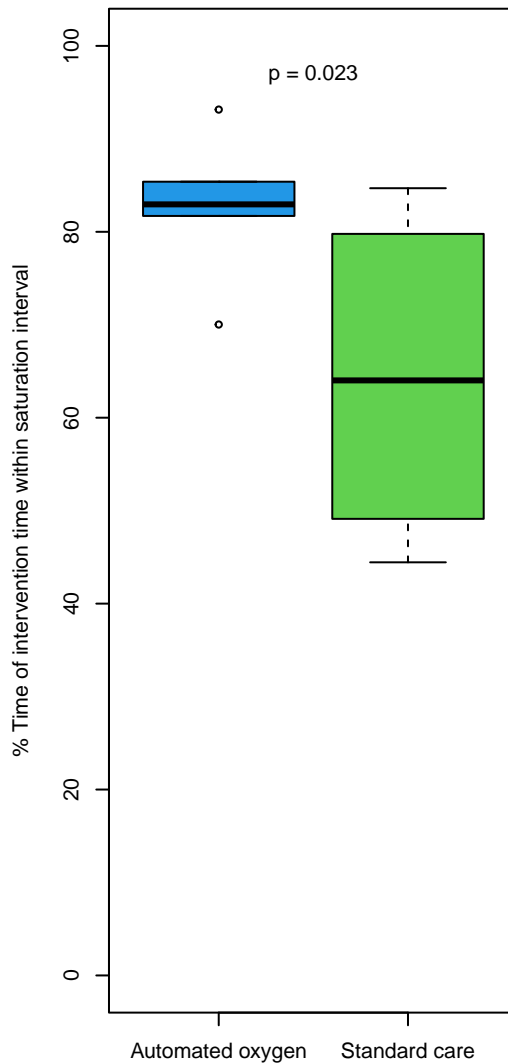

## Over desired interval

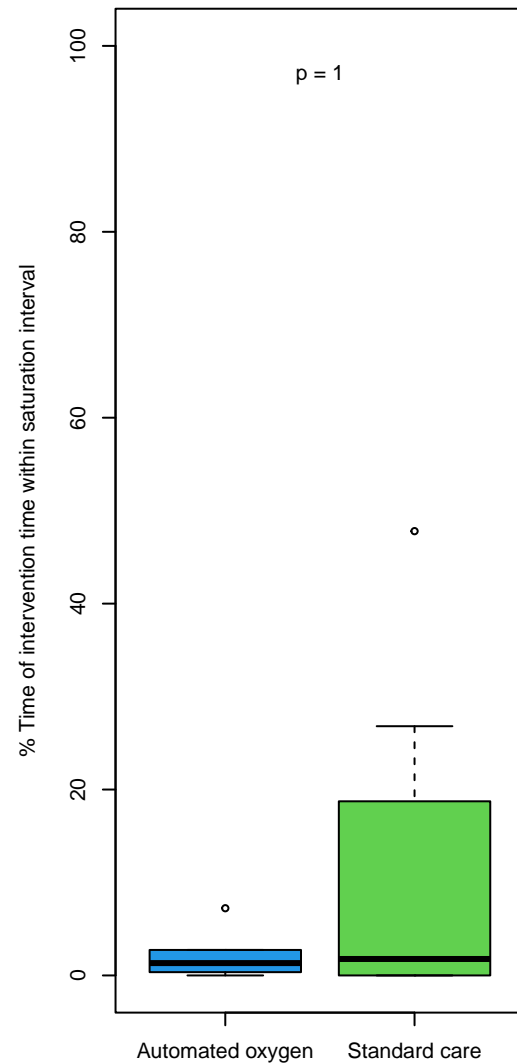

Supplement: heartjnl-111-1-s002.pdf [file heartjnl-111-1-s002.pdf]
