# Supplementary material for: Automated oxygen administration versus manual control in acute cardiovascular care: a randomised controlled trial
Source: PubMed Central journal article supplement — Heart. 2024 Nov 1;111(1):e324488. doi: 10.1136/heartjnl-2024-324488 (PMC11671931; doi:10.1136/heartjnl-2024-324488), 2024-11-01
Supplement: heartjnl-111-1-s003.pdf [file heartjnl-111-1-s003.pdf]

LVEF < 45%

### Under desired interval

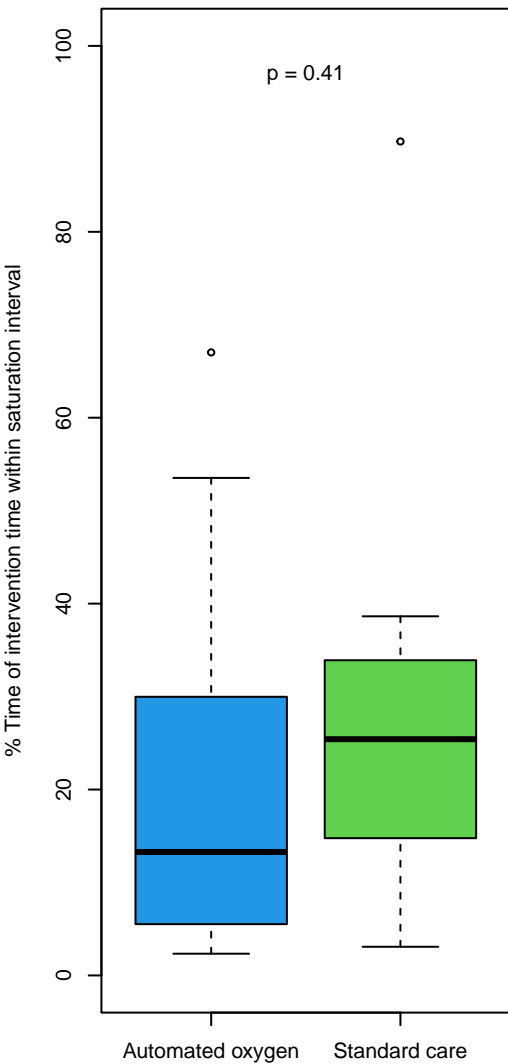

### Within desired interval

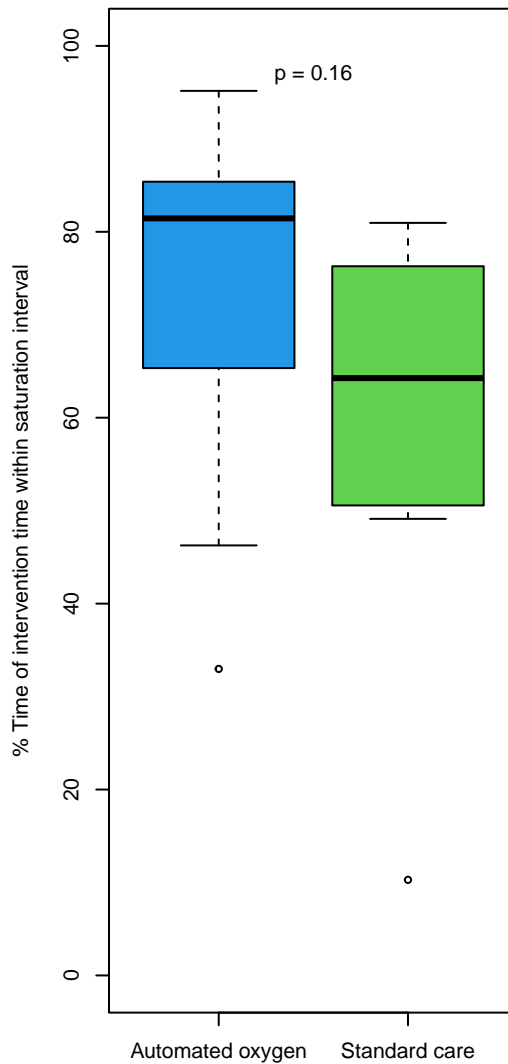

### Over desired interval

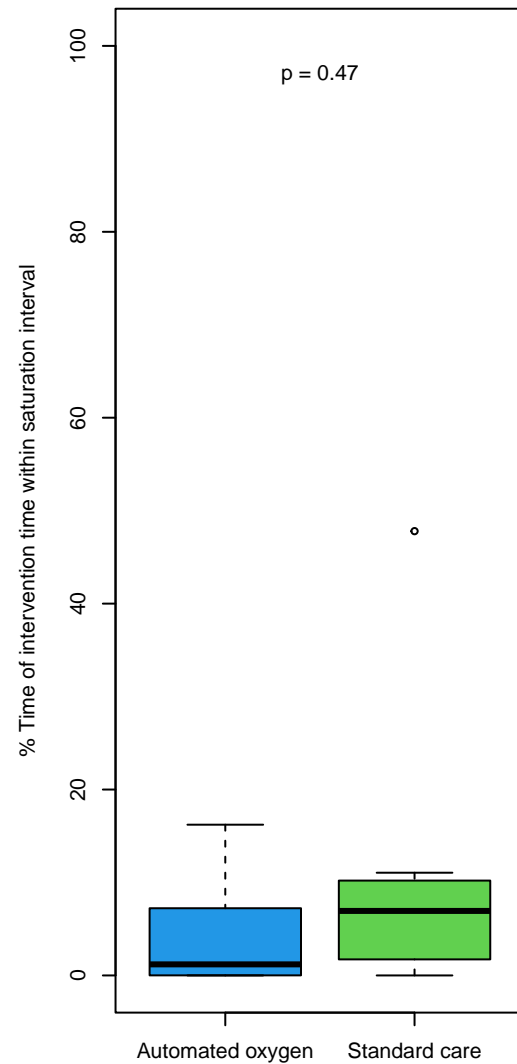

Intervention group
